# Supplementary material for: Pan-cancer systematic identification of lncRNAs associated with cancer prognosis
Source: PubMed Central journal article supplement (PMC7100599; doi:10.7717/peerj.8797), 2020-03-24
Supplement: peerj-08-8797-s003.pdf [file peerj-08-8797-s003.pdf]

## **Supplemental Methods**

### **Pan-cancer systematic identification of lncRNAs associated with cancer prognosis**

Matthew H. Ung, Evelien Schaafsma, Daniel E. Mattox, George L. Wang, Chao Cheng

## Generating regulon profiles

The mutual information for a lncRNA and its associated genes was computed using ARACNe-AP. Each mutual information value across all the genes interacting with the lncRNA was divided by the maximum mutual information. The values were then assigned a positive or negative sign based on the correlation coefficient ( $\rho_i$ ) between the lncRNA's expression and the interacting gene's expression across samples to generate the final weight  $r_j$ .

$$1) r_i = \text{sgn}(\rho_i) * \frac{MI_i}{\max(MI)}$$

The profile was further split into an upregulated and a downregulated profile where:

$$2) r_i^{up} = \begin{cases} r_i, & \text{if } r_i > 0 \\ 0, & \text{otherwise} \end{cases}$$

$$3) r_i^{down} = \begin{cases} |r_i|, & \text{if } r_i < 0 \\ 0, & \text{otherwise} \end{cases}$$

## Computing inferred expression using regulon profiles using BASE

A patient's gene expression profile is sorted in decreasing order to obtain  $\mathbf{g}$ . The vector  $\mathbf{r}^{up/down}$  is the upregulated or downregulated regulon weight profile where the weights correspond to a lncRNA-gene edge. The weights are re-ordered so that gene labels of  $\mathbf{r}$  and  $\mathbf{g}$  match.

First, BASE moves down the sorted patient's gene expression profile  $\mathbf{g}$  and calculates a foreground  $f(i)$  and background  $b(i)$  functions for both the upregulated and downregulated regulon weight profiles of the lncRNA.

$$1) f(i)^{up/down} = \frac{\sum_{j=1}^i |g_j r_j^{up/down}|}{\sum_{j=1}^n |g_j r_j^{up/down}|}, 1 \leq i \leq n$$

$$2) b(i)^{up/down} = \frac{\sum_{j=1}^i |g_j (1 - r_j^{up/down})|}{\sum_{j=1}^n |g_j (1 - r_j^{up/down})|}, 1 \leq i \leq n$$

Second, we calculate the pre-iExpr for upregulated and downregulated profiles and take their normalized difference to obtain the final iExpr for the lncRNA.

$$3a) \text{pre-iExpr}^{up} = f(i_{max})^{up} - b(i_{max})^{down}, \text{ where } i_{max} = \text{argmax}(|f(i)^{up} - b(i)^{down}|)$$

$$3b) \text{pre-iExpr}^{down} = f(i_{max})^{up} - b(i_{max})^{down}, \text{ where } i_{max} = \text{argmax}(|f(i)^{up} - b(i)^{down}|)$$

$$4) iExpr = \frac{\text{pre-iExpr}^{up}}{\text{mean}(\mathbf{n}^{up})} - \frac{\text{pre-iExpr}^{down}}{\text{mean}(\mathbf{n}^{down})}$$

pre-iExpr<sup>up/down</sup> is analogous to the D-statistic from the Kolmogorov-Smirnov test which compares the empirical distribution functions of two populations to determine if they are derived from the same distribution.  $\mathbf{n}^{up}$  is a vector of null values generated by permuting the patient gene expression profile 500 times and re-calculating pre-iExpr for the upregulated profile.  $\mathbf{n}^{down}$  is a vector of null values generated by permuting the patient gene expression profile 500 times and re-calculating pre-iExpr for the downregulated profile. These procedures were derived from the original BASE algorithm to fit this task.

### Calculating meta z-scores in PRECOG

For each lncRNA, we fit a Cox proportional hazards model to its inferred expression in each dataset within a cancer type:

$$1) h(t|iExpr) = h_0(t)e^{\beta * iExpr}$$

We then extract the z-scores from each model that was fit to each dataset separately:

$$2) Z = (\hat{\beta})/se(\hat{\beta})$$

To combine the z-scores across the datasets within the cancer type, we implemented Stouffer's Z-score method:

$$3) \text{meta z-score} = \frac{\sum_{i=1}^k w_i Z_i}{\sqrt{\sum_{i=1}^k w_i^2}}, \text{ where } w_i \text{ is the sample size of the } i\text{th dataset}$$
